# Supplementary material for: Enhancing Yield and Physiological Performance by Foliar Applications of Chemically Inert Mineral Particles in a Rainfed Vineyard under Mediterranean Conditions
Source: MDPI journal article supplement (doi:10.3390/plants12071444), 2023-03-24
Supplement: s1 [file s1]

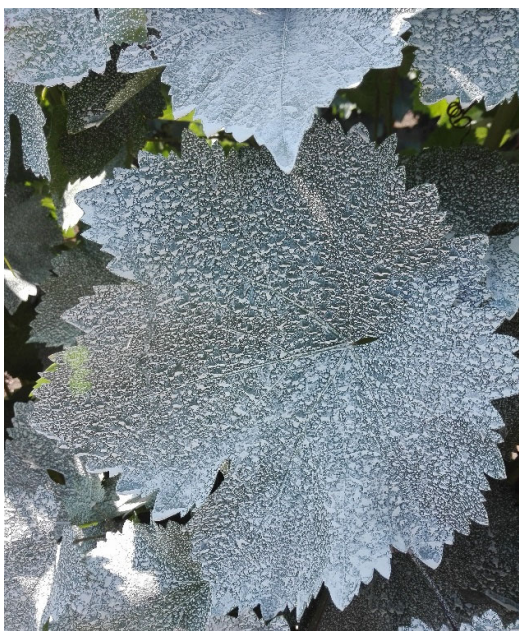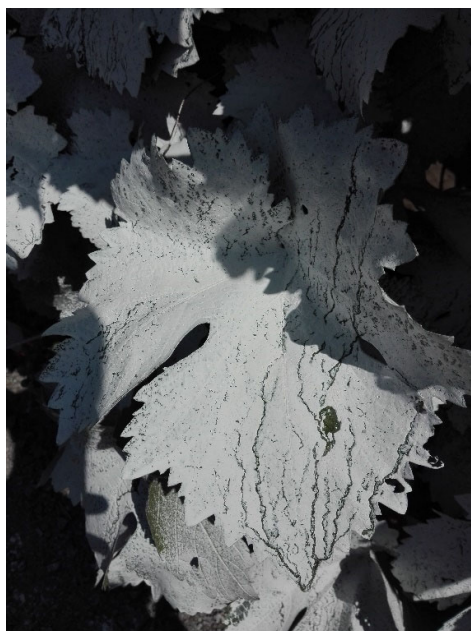

**Supplementary Figure S1.** Typical white residues on Roditis grapevine leaves after kaolin (left) and zeolite applications (right). Photos were taken one hour after the first application.
